# Supplementary material
Source: Springer Nature journal article supplement (https://www.springermedizin.de/resource/supplementary/13045_2013_351_MOESM5_ESM.pdf/9661190)

CDKN1A fold increase

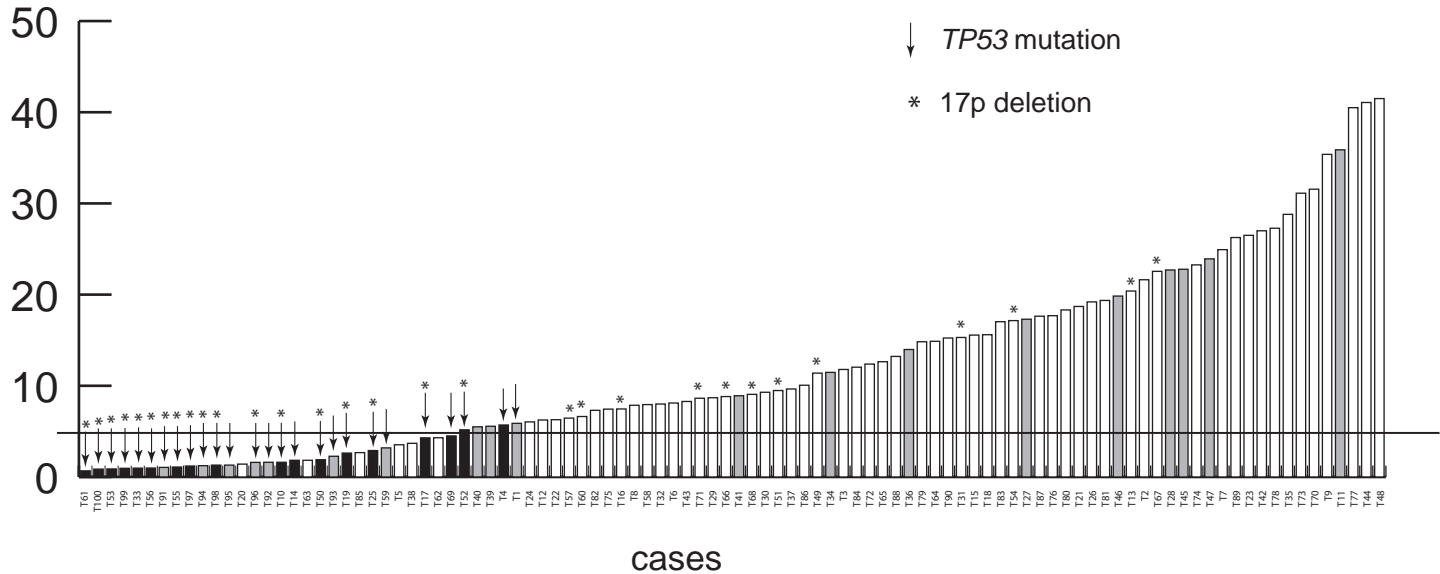

Supplement: MOESM5 [file 9661190]
